# Supplementary material for: Novel Mechanisms Underlying Rubber Accumulation and Programmed Cell Death in Laticiferous Canals of Decaisnea insignis Fruits: Cytological and Transcriptomic Analyses
Source: MDPI journal article supplement (doi:10.3390/plants12193497), 2023-10-07
Supplement: s1 [file s1]

**Supplementary Table S1 qRT-PCR Primers.**

| Primer name       | Primer sequence (5'-3') | Primer length (bp) |
|-------------------|-------------------------|--------------------|
| <i>DiAct1</i> -F  | AGTTCTCCTCACCGAAGCAC    | 20                 |
| <i>DiAct1</i> -R  | CCCTTCGTAGATGGGAACCG    | 20                 |
| <i>DiIPP2</i> -F  | GCACATGCAGAAGCTATACGG   | 22                 |
| <i>DiIPP2</i> -R  | TAATGCTCTCTCCGGTGCTC    | 20                 |
| <i>DiFPP</i> -F   | TCGACTTCTTCACCACTGGC    | 20                 |
| <i>DiFPP</i> -R   | AGGAGATGGATCGTCGGAGT    | 20                 |
| <i>DiREF6</i> -F  | AGTTTCGAGGGCAAAAGGGT    | 20                 |
| <i>DiREF6</i> -R  | TCTCTGGGCACTCCATACCA    | 20                 |
| <i>DiGGPPS</i> -F | TCGAGGTTTCATCACGTCGTC   | 20                 |
| <i>DiGGPPS</i> -R | GAGATCTACTGGCGCGAGAC    | 20                 |
| <i>DiHRT1</i> -F  | TAGGGAGTTTGGTGCGAAGG    | 20                 |
| <i>DiHRT1</i> -R  | CACGTACTTCACCCCGAGTT    | 20                 |
| <i>DiLSD1</i> -F  | TTGTGTGACAGCAGGAGCAT    | 20                 |
| <i>DiLSD1</i> -R  | CTTGTGTGCAACGGGTGTAG    | 20                 |
| <i>DiLOL2</i> -F  | CCGACAGGACAGCAATCCAT    | 20                 |
| <i>DiLOL2</i> -R  | CCGACAGGACAGCAATCCAT    | 20                 |
| <i>DiXCP1</i> -F  | TGCAAACCTCATTCAACCCAAGC | 22                 |
| <i>DiXCP1</i> -R  | TGGGTATTTCACCGGACGAC    | 20                 |
| <i>DiCEP1</i> -F  | CTGTTGCTAACCAGCCCGTA    | 20                 |
| <i>DiCEP1</i> -R  | CCAGTTGGCTCCCCATGAAT    | 20                 |
