# Supplementary material for: Novel Mechanisms Underlying Rubber Accumulation and Programmed Cell Death in Laticiferous Canals of Decaisnea insignis Fruits: Cytological and Transcriptomic Analyses
Source: MDPI journal article supplement (doi:10.3390/plants12193497), 2023-10-07
Supplement: s1 [file s1]

**Supplementary Table S2 Cytological, genetic and transcriptional changes in different developmental stage of laticiferous canal in *Decaisnea insignis* fruit**

| Evants              | Stage 1                                                                   | Stage 2                                                                                                                                                                                                                                                                     | Stage 3                                                                                                                                                                                                                     | Stage 4                                                                                                                           |
|---------------------|---------------------------------------------------------------------------|-----------------------------------------------------------------------------------------------------------------------------------------------------------------------------------------------------------------------------------------------------------------------------|-----------------------------------------------------------------------------------------------------------------------------------------------------------------------------------------------------------------------------|-----------------------------------------------------------------------------------------------------------------------------------|
| Rubber accumulation | A little amount of brown irregular flocculent                             | Membrane structures and obvious osmiophilic mass in cytoplasm; vacuoles with increasing membrane structures; dark osmiophilic material and diffused flocculent material from the engulfed cytoplasm                                                                         | A little amount of irregular flocculent and plenty of brown rubber particles                                                                                                                                                | Full of round or elliptical rubber particles                                                                                      |
|                     | <i>DiIPP2</i>                                                             | ↓                                                                                                                                                                                                                                                                           | ↓                                                                                                                                                                                                                           | ↑                                                                                                                                 |
|                     | <i>DiFPP</i>                                                              | ↓                                                                                                                                                                                                                                                                           | ↓                                                                                                                                                                                                                           | ↑                                                                                                                                 |
|                     | <i>DiREF6</i>                                                             | -                                                                                                                                                                                                                                                                           | ↓                                                                                                                                                                                                                           | -                                                                                                                                 |
|                     | <i>DiHRT</i>                                                              | ↑                                                                                                                                                                                                                                                                           | ↑                                                                                                                                                                                                                           | ↓                                                                                                                                 |
|                     | <i>DiGGPPS</i>                                                            | -                                                                                                                                                                                                                                                                           | ↓                                                                                                                                                                                                                           | -                                                                                                                                 |
| PCD characters      | Relatively small size; dense cytoplasm; large nucleus; and small vacuoles | Thinning of the cell walls; the cytoplasm with more condensed feature; DNA fragmentation and TUNEL positive nuclei, misshapen nucleus with condensed chromatin; plastids with condensed matrix and indistinct thylakoids; misshapen mitochondria with disorganized membrane | Volume of secretory epidermal cells enlarged with a fivefold to eightfold increase; plastids with degenerated thylacoid system, mitochondria, and misshapen nucleus in vacuole; the nucleus enveloped by the rubber granule | The secretory epidermal cell walls with a thinner shape and even lysis of some parts; tonoplast rupture; plasma membrane collapse |
|                     | <i>DiCEP1</i>                                                             | ↓                                                                                                                                                                                                                                                                           | ↓                                                                                                                                                                                                                           | -                                                                                                                                 |
|                     | <i>DiXCP1</i>                                                             | -                                                                                                                                                                                                                                                                           | ↓                                                                                                                                                                                                                           | -                                                                                                                                 |
|                     | <i>DiLSD1</i>                                                             | ↓                                                                                                                                                                                                                                                                           | ↓                                                                                                                                                                                                                           | ↑                                                                                                                                 |
|                     | <i>DiLOL2</i>                                                             | -                                                                                                                                                                                                                                                                           | ↑                                                                                                                                                                                                                           | ↑                                                                                                                                 |

**Note:** The arrows indicate trends at gene expression levels based on transcript FPKM values: a "↑↓" arrow indicates that the gene is significantly ( $p < 0.05$ ) up or down regulated from the previous stage, and a "-" indicates that the gene is not significantly different from the previous stage.
